# Supplementary material for: HSP60 Regulates Monosodium Urate Crystal-Induced Inflammation by Activating the TLR4-NF-κB-MyD88 Signaling Pathway and Disrupting Mitochondrial Function
Source: Hindawi journal article supplement (doi:10.1155/2020/8706898), 2020-12-30

# Supplementary Figure 6

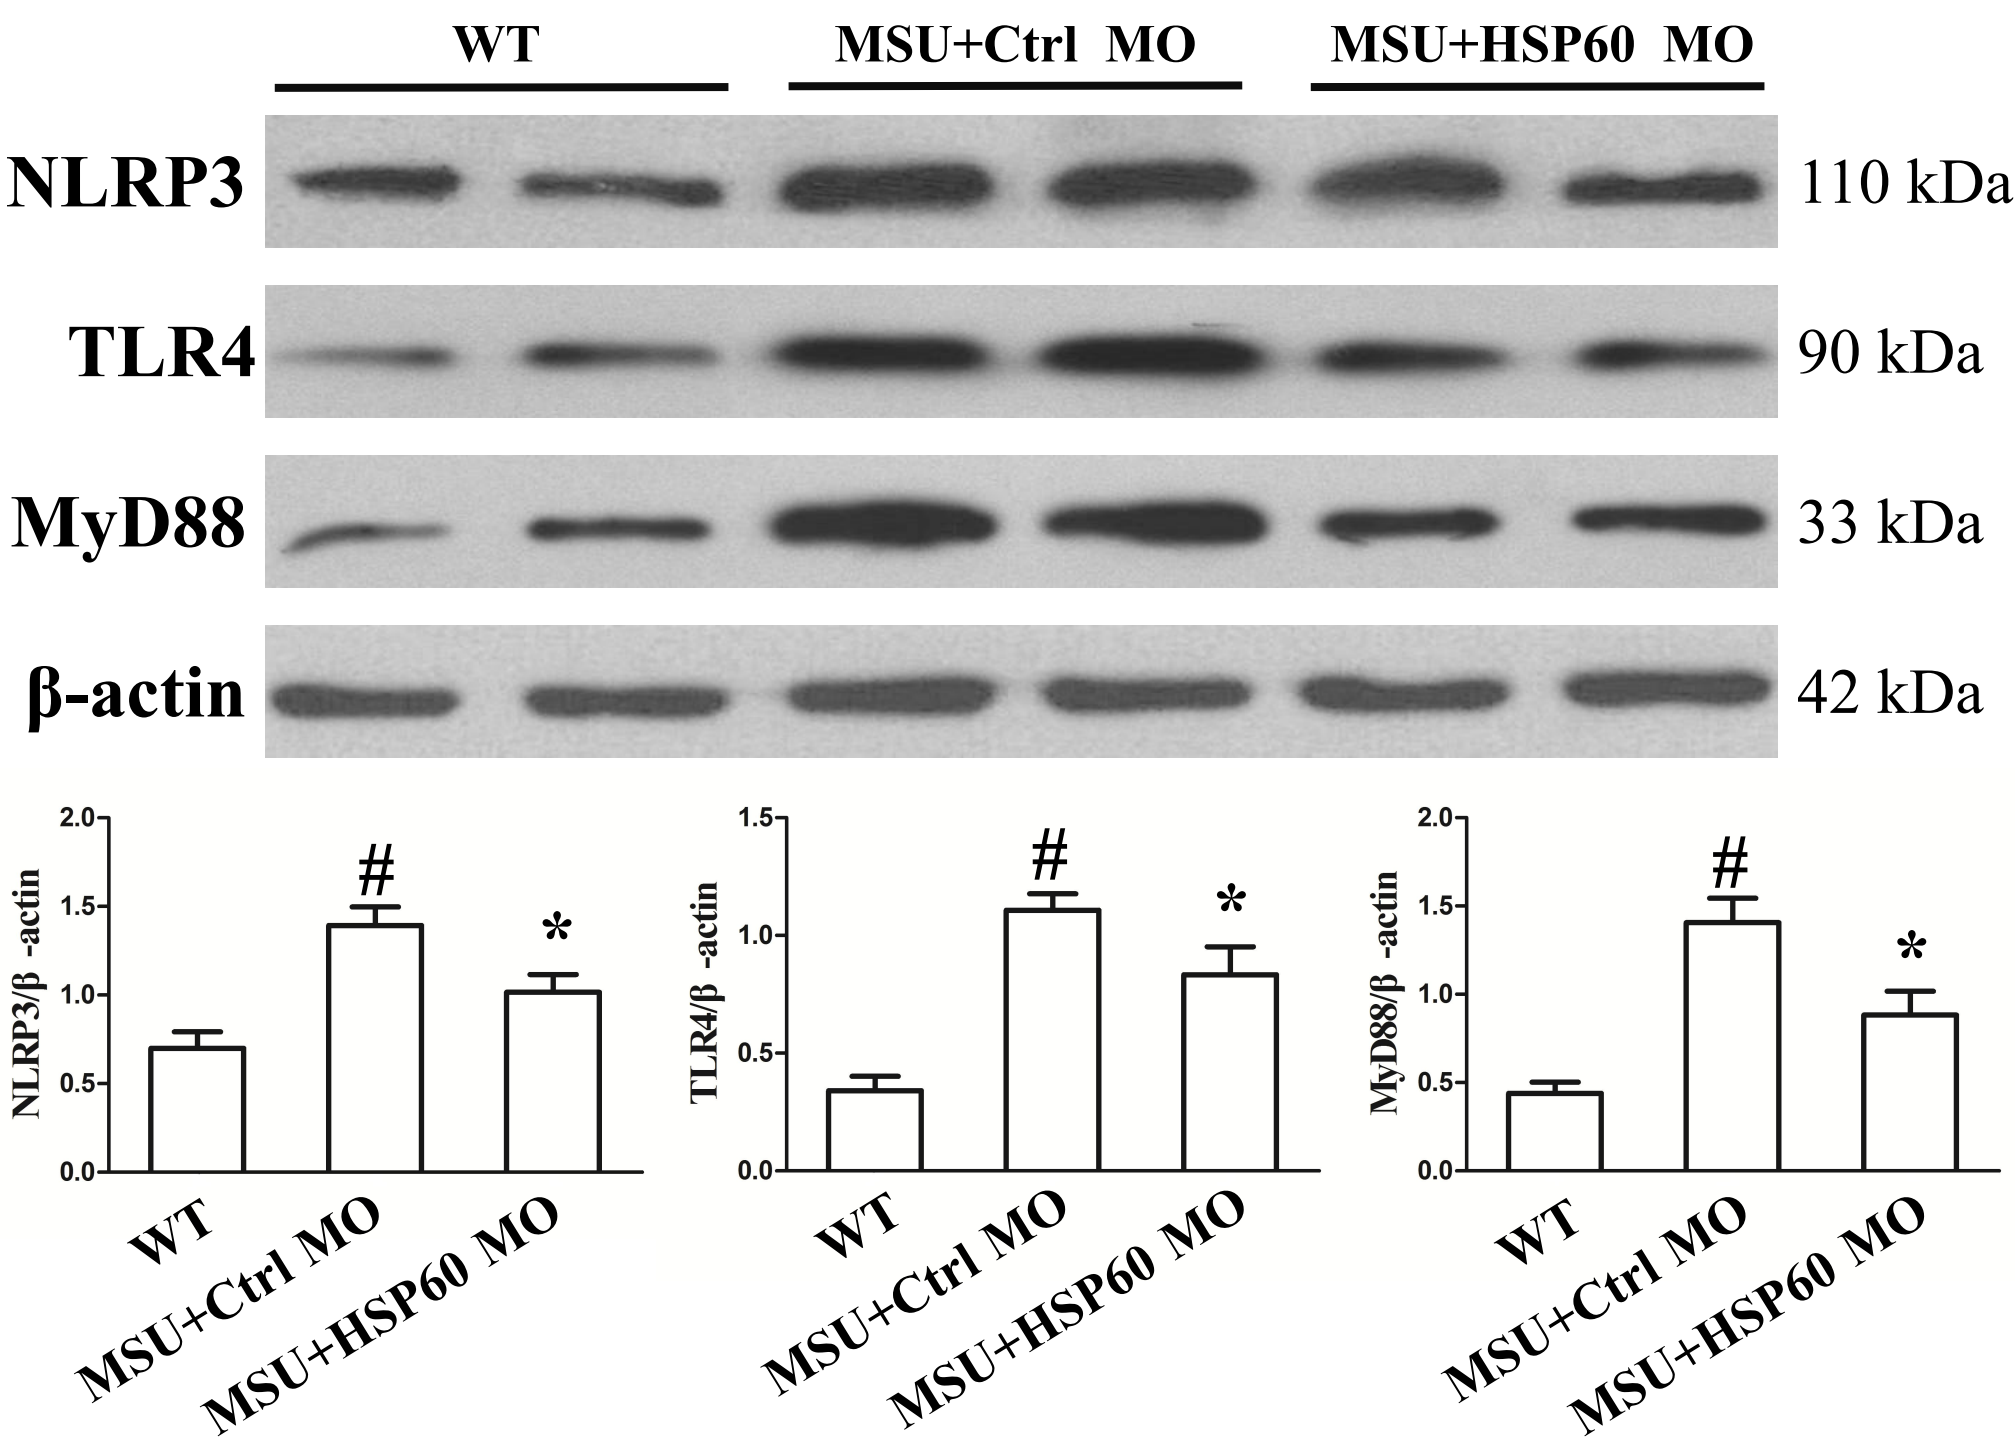

Supplement: f6 [file 8706898.f6.pdf]
